# Supplementary material for: Molecular Biogeography: Towards an Integrated Framework for Conserving Pan-African Biodiversity
Source: PLoS One. 2007 May 23;2(5):e454. doi: 10.1371/journal.pone.0000454 (PMC1866246; doi:10.1371/journal.pone.0000454)
Supplement: Table S3 — Refining the Olson model and defining core ecoregions for 23 bushbuck haplogroups. (0.03 MB XLS) [file pone.0000454.s003.xls]

## Sheet: Sheet1
Table S3
Refining the Olson model and defining core ecoregions for 23 bushbuck haplogroups. Ecoregions highlighted in yellow were subdivided as the haplogroup distributions within them were mutually exclusive (did not overlap). The new ecoregions resulting from this subdivision are highlighted in light blue.
Core ecoregions are either inhabited uniquely by a single haplogroup (highlighted in red) or are inhabited by more than 50% of a haplogroups members (highlighted in orange).
Biogeographic Province	Ecoregion	Code	scriptus	bor	dodingae	decula	Upper Volta	Lower Volta	Niger	phaleratus	sylvaticus	meneliki	powelli	dianae	barkeri	dama	massaicus	haywoodi	fasciatus2	Zambezi	Luangwa	roualeyni	fasciatus1	ornatus	Angola
(after Udvardy, 1975)	(after Olson et al. 2001)
Central African highlands	Albertine Rift montane forests	AT0101												13		4
Congo rain forest	Atlantic Equatorial coastal forests	AT0102								34
Guinean highlands	Cameroonian Highlands forests	AT0103							5	1
Guinean rain forest	Cross-Sanaga-Bioko coastal forests	AT0107								4
East African highlands	East African montane forests	AT0108			1									2	5	4	2	7
East African highlands	Gregory Rift montane forests	AT0108a															2	7
East African highlands	Imatong and Karamoja montane forests	AT0108b			1										5
East African highlands	Mount Elgon montane forests	AT0108c												2		4
Guinean rain forest	Eastern Guinean forests	AT0111					6	21
Ethiopian highlands	Ethiopian montane forests	AT0112											3
South African woodland/savanna	Knysna-Amatole montane forests	AT0115									4
South African woodland/savanna	KwaZulu-Cape coastal forest mosaic	AT0116									3
South African woodland/savanna	Maputaland coastal forest mosaic	AT0119															1					1
Guinean highlands	Mount Cameroon and Bioko montane forests	AT0121								11
Congo rain forest	Northeastern Congolian lowland forests	AT0124		2
Somalian	Northern Zanzibar-Inhambane coastal forest mosaic	AT0125															1		4				3
Congo rain forest	Northwestern Congolian lowland forests	AT0126		2						6
South African woodland/savanna	Southern Zanzibar-Inhambane coastal forest mosaic	AT0128															3
Guinean rain forest	Western Guinean lowland forests	AT0130	4				2
Miombo woodland/savanna	Angolan Miombo woodlands	AT0701																							3
Miombo woodland/savanna	Central Zambezian Miombo woodlands	AT0704												13										12
Miombo woodland/savanna	East African Miombo woodlands	AT0704a												13
Miombo woodland/savanna	Zambezian Miombo woodlands	AT0704b																						12
West African woodlands/savanna	East Sudanian savanna	AT0705		10	4	6
West African woodlands/savanna	Central Sudanian savanna	AT0705a		10
East African woodlands/savanna	Equitoria Sudanian savanna	AT0705b			4	6
Miombo woodland/savanna	Eastern Miombo woodlands	AT0706															2
West African woodlands/savanna	Guinean forest-savanna mosaic	AT0707	6						9
West African woodlands/savanna	West Guinean forest-savanna mosaic	AT0707a	6
West African woodlands/savanna	East Guinean forest-savanna mosaic	AT0707b							9
South African woodland/savanna	Kalahari Acacia-Baikiaea woodlands	AT0709																						2
East African woodlands/savanna	Northern Acacia-Commiphora bushlands and thickets	AT0711																1	1
West/East African woodlands/savanna	Northern Congolian forest-savanna mosaic	AT0712		7						1
Western/Eastern Sahel	Sahelian Acacia savanna	AT0713		3		2
Western Sahel	Central Sahelian Acacia savanna	AT0713a		3
Eastern Sahel	Eritrean Sahelian Acacia savanna	AT0713b				2
East African woodlands/savanna	Serengeti volcanic grasslands	AT0714												7			1
Somalian	Somali Acacia-Commiphora bushlands and thickets	AT0715				5
East African woodlands/savanna	Southern Acacia-Commiphora bushlands and thickets	AT0716															12
South African woodland/savanna	Southern Africa bushveld	AT0717									3											21
Congo woodlands/savanna	Southern Congolian forest-savanna mosaic	AT0718								11
Miombo woodland/savanna	Southern Miombo woodlands	AT0719															8			3	1			11
East African woodlands/savanna	Victoria Basin forest-savanna mosaic	AT0721		2										1		6
West African woodlands/savanna	West Sudanian savanna	AT0722					21	1	5
Congo woodlands/savanna	Western Congolian forest-savanna mosaic	AT0723								9
Miombo woodland/savanna	Zambezian and Mopane woodlands	AT0725									2						11			8	4			9
Miombo woodland/savanna	Eastern Zambezian and Mopane woodlands	AT0725a									2						11			8
Miombo woodland/savanna	Luangwa Valley Zambezian and Mopane woodlands	AT0725b																			4
Miombo woodland/savanna	Western Zambezian and Mopane woodlands	AT0725c																						9
Miombo woodland/savanna	Zambezian Baikiaea woodlands	AT0726																						4
West African woodlands/savanna	Lake Chad flooded savanna	AT0904		1
East African woodlands/savanna	Saharan flooded grasslands	AT0905		5
South African woodland/savanna	Zambezian coastal flooded savanna	AT0906															1
Miombo woodland/savanna	Zambezian flooded grasslands	AT0907												6			1
Congo woodlands/savanna	Angolan scarp savanna and woodlands	AT1002																							9
South African highlands	Drakensberg montane grasslands, woodlands and forests	AT1004									8											4
South African woodland/savanna	Eastern Zimbabwe montane forest-grassland mosaic	AT1006															2
Ethiopian highlands	Ethiopian montane grasslands and woodlands	AT1007										13
Ethiopian highlands	Ethiopian montane moorlands	AT1008										6
South African woodland/savanna	Maputaland-Pondoland bushland and thickets	AT1012									2
Miombo woodland/savanna	South Malawi montane forest-grassland mosaic	AT1014															2
South African woodland/savanna	Albany thickets	AT1201									2
Cape Sclerophyll	Lowland fynbos and renosterveld	AT1202									8						2
Karroo	Nama Karoo	AT1314									6
		N (indiviuals)	10	32	5	13	29	22	19	77	38	19	3	42	5	14	49	8	5	11	5	26	3	38	12
		N (Ecoregons)	2	8	2	3	3	2	3	8	9	2	1	6	1	3	14	1	2	2	2	3	1	5	2
		N (Exclusive habitation)	1	5	0	2	0	0	1	5	5	2	1	1	0	0	6	0	0	0	1	0	0	4	2
		N (>50% habitation)	0	0	1	0	1	1	0	0	0	0	0	0	1	0	0	1	1	1	0	1	1	0	0
		N (Core ecoregions)	1	5	1	2	1	1	1	5	5	2	1	1	1	0	6	1	1	1	1	1	1	4	2
		% in Core habitat	60	65.6	80	53.8	72.4	95.4	47.3	89.6	44.7	100	100	30.9	100	0	44.8	100	100	72.7	80	80.1	100	71	100
